# Supplementary material for: Production of formate from CO2 gas under ambient conditions: towards flow-through enzyme reactors
Source: Royal Society of Chemistry journal article supplement (doi:10.1039/d0gc00952k), 2020-01-01
Supplement: d0gc00952k1.pdf [file d0gc00952k1.pdf]

## Supporting Information

### Production of formate from CO<sub>2</sub> gas under ambient conditions: towards flow-through enzymes reactors

Mohamed Baccourt<sup>†</sup>, Alexandra Lamotte<sup>†§</sup>, Kento Sakai<sup>‡</sup>, Eric Dubreucq<sup>§</sup>, Ahmad Mehdi<sup>†</sup>, Kenji Kano<sup>‡</sup>, Anne Galarneau<sup>†</sup>, Jullien Drone<sup>\*†</sup>, Nicolas Brun<sup>\*†</sup>

<sup>†</sup>Institut Charles Gerhardt Montpellier (ICGM), Univ Montpellier, CNRS, ENSCM, Montpellier (France)

<sup>‡</sup>Division of Applied Life Sciences, Graduate School of Agriculture, Kyoto University, Sakyo, Kyoto (Japan)

<sup>§</sup>Ingénierie des Agropolymères et Technologies Emergentes, UMR IATE, Univ. Montpellier-SupAgro-INRA-CIRAD, Montpellier (France)

## Table of Contents

### S1- PtDH production and characterization

### S2- FoDH production and characterization

#### S2.1- *Cb*FoDH

#### S2.2- *Ts*FoDH

#### S2.3- *Me*FoDH1

#### S2.4- Comparison of specific activities

### S3- Formate monitoring: HPLC analytical procedure

### S4- Batch reaction

#### S4.1- Experimental procedure

#### S4.2- Influence of CO<sub>2</sub> bubbling

### S5- Flow through reaction

#### S5.1- Carbon monolith preparation and characterization

#### S5.2- Experimental procedure

### S6- CO<sub>2</sub> adsorption isotherms of monolithic supports at 273 K

### S7- Comparison of catalytic activity with literature

## S1- PtDH production and characterization

The genetic construct encoding of the phosphite dehydrogenase (PtDH) was obtained by courtesy of Prof. H. M. Zhao (University of Illinois) [1] and produced and purified by Rémi Cazelles [2]. In brief, *Escherichia coli* BL21\*(DE3) (Life Technologies) was transformed by the plasmid pET15b-PTDH12x and used to overexpress the enzyme as previously described with slight modifications. Homogeneous enzyme preparation was obtained after purification using IMAC Ni<sup>2+</sup> (HisTrap 1 mL, GE Healthcare) followed by desalting (HiTrap 5 mL, GE Healthcare) with conservation buffer (50 mM MOPS, 10% glycerol, pH 7.25) under standard conditions. Aliquots of the enzyme were stored at -80 °C until use.

### Specific activity of PtDH ( $U_{\text{PtDH}}$ )

The specific activity of **PtDH** ( $U_{\text{PtDH}}$ ) was determined by monitoring the reduction of NAD cofactor and the production of NADH which absorbs at 340 nm. The evolution of the absorbance is plotted against time (fig. S1).

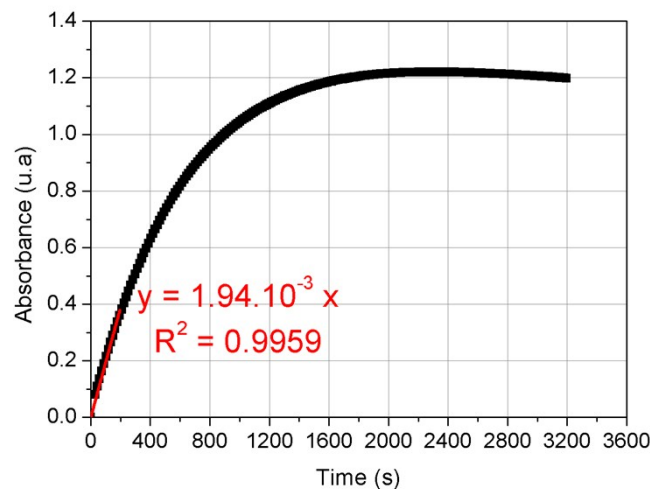

**Figure S1.** Absorbance = f (time) of the production of NADH in presence of PtDH at 340 nm plotted against time.

The initial rate is calculated from the slope between 0 and 195 s.

$$\text{Abs} = 0.00194 t$$

$$V = \frac{\text{Abs}}{t} = \frac{\varepsilon \cdot l \cdot C}{t} = \frac{\varepsilon \cdot l \cdot n}{t \cdot V} = \frac{\varepsilon \cdot l \cdot U}{V} = 0.00194 \text{ s}^{-1}$$

$$U_{\text{PtDH}} = \frac{v \cdot V}{\epsilon \cdot l} = 3.743 \cdot 10^{-2} \mu\text{mol NADH}_{\text{produced}}/\text{min (for 4 } \mu\text{L of PtDH enzymatic solution)}$$

The **PtDH** concentration is 7.3  $\mu\text{g}/\mu\text{L}$ . This concentration was determined by Bradford method using bovine serum albumin (BSA) as standard.

|                                                                                                                                       |
|---------------------------------------------------------------------------------------------------------------------------------------|
| $U_{\text{PtDH}} = 1.28 \cdot 10^{-3} \mu\text{mol NADH}_{\text{produced}}/\text{min for 1 } \mu\text{g PtDH in initial rate phase.}$ |
|---------------------------------------------------------------------------------------------------------------------------------------|

## S2- FoDH production and characterization

### S2.1- Commercial CbFoDH

Formate dehydrogenase (Homo-dimer, 80.7 kDa) from *Candida boidinii* (CbFoDH) was purchased from Sigma-Aldrich.

### S2.2- TsFoDH

Formate dehydrogenase from *Thiobacillus sp.* KNK65MA was produced and purified according to the literature [3]. Homogeneous enzyme preparation was obtained after purification using IMAC  $\text{Ni}^{2+}$  (HisTrap 1 mL, GE Healthcare) followed by desalting (HiTrap 5 mL, GE Healthcare) with conservation buffer (50 mM MOPS, 10% glycerol, pH 7.25) under standard conditions. Aliquots of the enzyme were stored at  $-80^\circ\text{C}$  until use.

### S2.3- MeFoDH1

Formate dehydrogenase from *Methylobacterium extorquens* was provided by Pr. K. Kano (Kyoto University, Japan). MeFoDH1 was produced and purified according to the literature [4]. *Methylobacterium extorquens* AM1 (NCIMB 9133) was purchased from NCIMB (Aberdeen, Scotland, UK). The cells were grown at  $28^\circ\text{C}$  in modified Luria broth, which consisted of 1% hipolypepton, 1% yeast extract, 0.5% sodium chloride, 1  $\mu\text{M}$  sodium tungstate and 0.5  $\mu\text{M}$  sodium molybdate. The cells were cultivated in 500 mL Erlenmeyer flasks filled with 150 mL medium. The cells were collected, suspended with 20 mM potassium phosphate buffer (KPB) pH 6.0 and then disrupted two times with a French pressure cell (Otake Works, Japan) at 100 MPa. Centrifugation was performed at 100,000 RPM for 1 h at  $4^\circ\text{C}$  to remove cell debris. The supernatant solution was loaded on a Toyopearl DEAE-650 M column (Tosoh Corporation, Japan) equilibrated with 20 mM KPB pH 6.0. MeFoDH1

was eluted with linear gradient of NaCl from 120 mM to 180 mM in the KPB pH 6.0. The sample was collected and applied to a Toyopearl Butyl-650 M column (Tosoh Corporation, Japan) equilibrated with the KPB containing 20% (w/w) ammonium sulfate. The elution of *MeFoDH1* was carried out under a linear gradient of ammonium sulfate from 12% to 8% in the same KPB pH 6.0. All purification steps were performed at 4°C under aerobic conditions. Protein concentrations were determined with the Pierce® BCA Protein Assay Kit (Thermo Scientific, USA) using bovine serum albumin as a standard. The purities of *MeFoDH1* were judged by Coomassie brilliant blue R-250 staining of SDS-PAGE. The enzyme is a heterodimer with two units ( $\alpha$  $\beta$ ) of 107 and 61 kDa, respectively (fig. S2).

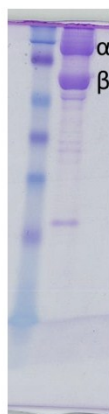

**Figure S2.** SDS page of *MeFoDH1*.

### **Specific activity of *MeFoDH1* ( $U_{MeFoDH1}$ )**

The specific activity of *MeFoDH1* ( $U_{MeFoDH1}$ ) was determined by oxidizing the reduced form of the NAD cofactor while reducing  $Na_2CO_3$ . This oxidation was monitored by UV absorbance at 340 nm (fig. S3).

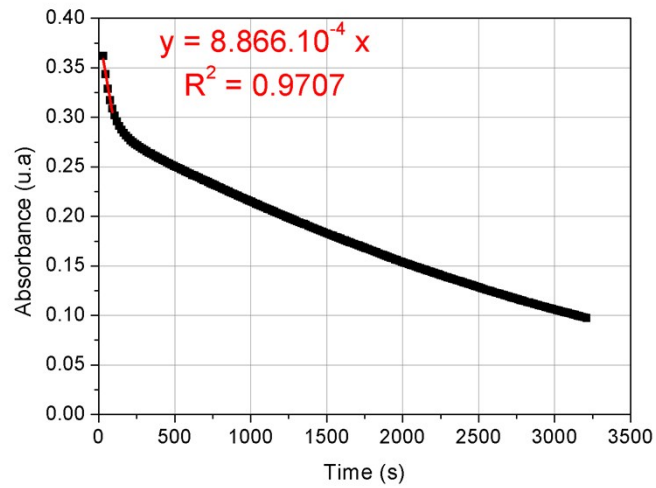

**Figure S3.** Absorbance = f (time) of the consumption of NADH by *MeFoDH1* at 340 nm plotted against time.

The initial rate of the consumption of NADH is calculated from the slope between 0 and 90 s.

$$\text{Abs} = 8.86693.10^{-4} t$$

$$V = \frac{\text{Abs}}{t} = \frac{\varepsilon.l.C}{t} = \frac{\varepsilon.l.n}{t.V} = \frac{\varepsilon.l.U}{V} = 8.86693.10^{-4} \text{ s}^{-1}$$

$$U = \frac{v.V}{\varepsilon.l} = 0.017 \text{ } \mu\text{mol NAD}^+_{\text{produced}}/\text{min (for 4 } \mu\text{L of } \mathbf{MeFoDH1} \text{ enzymatic solution)}$$

The **MeFoDH1** concentration is 15.4  $\mu\text{g}.\mu\text{L}^{-1}$ . This Concentration is determined with Bradford method using BSA as reference.

$$\mathbf{U_{MeFoDH1}} = 2.76.10^{-4} \text{ } \mu\text{mol NAD}^+_{\text{produced}}/\text{min for 1 } \mu\text{g } \mathbf{MeFoDH1} \text{ in initial rate phase.}$$

## S2.4- Comparison of specific activities

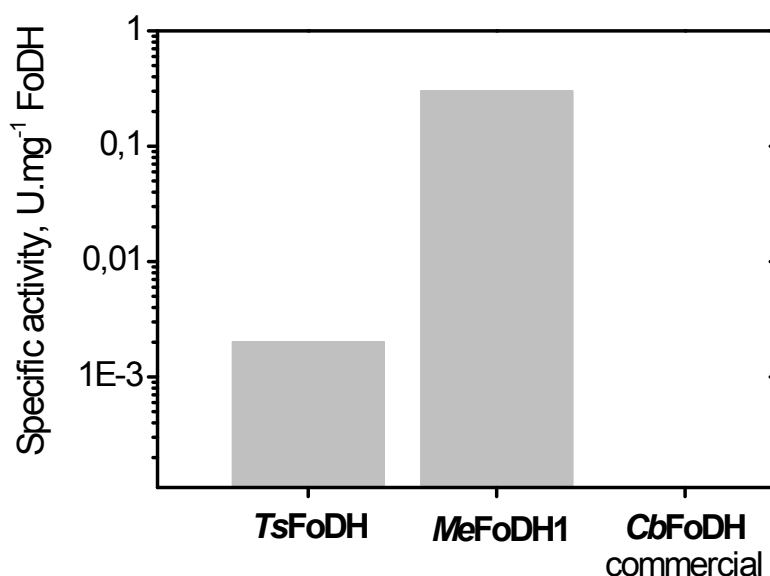

**Figure S4.** Specific activity of the three formate dehydrogenases employed in this study

## S3- Formate monitoring: HPLC analytical procedure

In order to determine the retention time of the different species present in the reaction medium and make sure that it would be possible to measure the concentration of formate, we analyze each ionic species with high performance liquid chromatography. The measurements are done with UV detector at 210 nm. The obtained chromatograms (fig. S5) show that only formic acid has a retention time of  $19.97 \pm 0.38$  min. The bioreduction of CO<sub>2</sub> could be monitored by dosing formic acid produced with ion exchange chromatography.

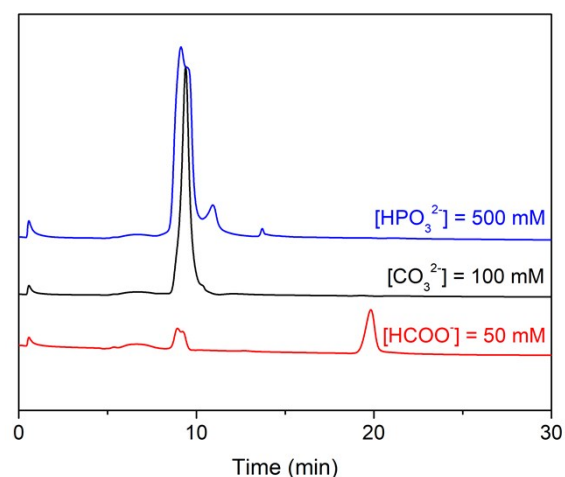

**Figure S 5.** Chromatograms of three samples: formic acid, carbonate and phosphite buffer.

A standard range with different concentration of formate was prepared: Sodium bicarbonate  $[\text{Na}_2\text{CO}_3] = 100 \text{ mM}$ , phosphite buffer  $[\text{Na}_2\text{HPO}_3] = 500 \text{ mM}$  and formic acid  $[\text{HCOO}^-] = 0 ; 1 ; 2 ; 4 ; 8 ; 16 ; 32 ; 64$  and  $100 \text{ mM}$ . This standard was prepared with a concentration of  $\text{H}_2\text{SO}_4$  equivalent to that of the mobile phase  $[\text{H}_2\text{SO}_4] = 2.5 \text{ mM}$ .

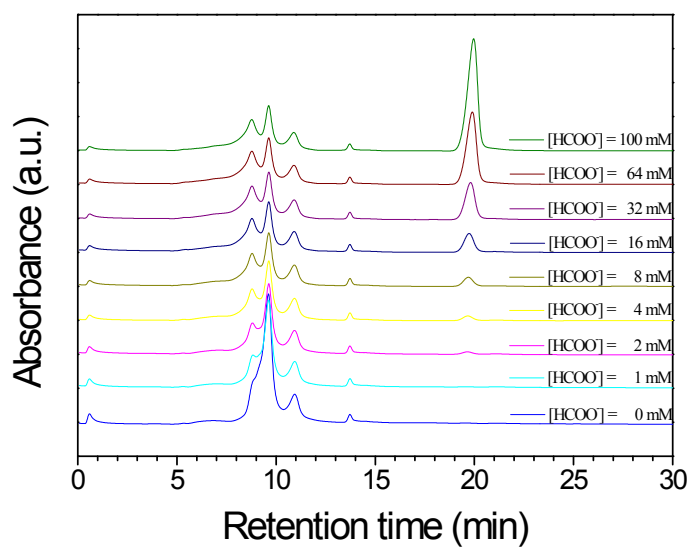

**Figure S6.** Chromatograms obtained for formate standard range.

The chromatograms show that the intensity and the peak area at the retention time  $19.97 \pm 0.38$  min increase by the increasing of the concentration of formate  $[\text{HCOO}^-]$ . A standard range  $[\text{HCOO}^-]$  = function (Peak area at  $t_r = 19.97 \pm 0.38$  min) was obtained (fig. S7).

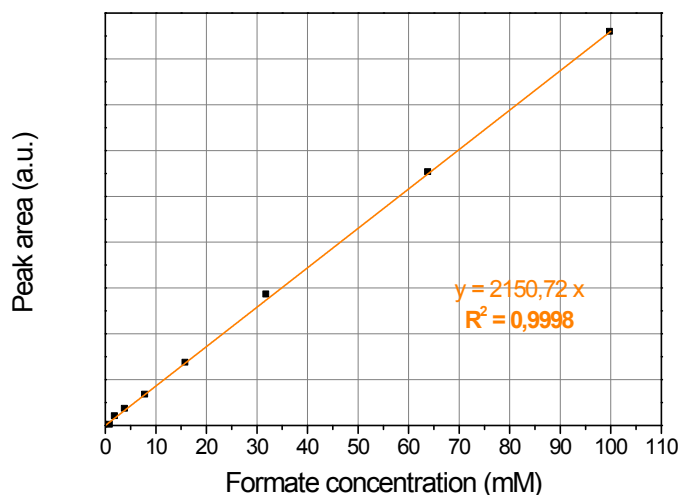

**Figure S 7.** Peak area at  $t_r = 19.97 \pm 0.38$  min as a function of formate concentration

## S4- Batch reaction

### S4.1- Experimental procedure

The procedure consists on preparing a 2 mL solution “S” which contains  $[\text{NaHCO}_3] = 100$  mM ;  $[\text{Na}_2\text{HPO}_3] = 500$  mM ; and  $[\text{NAD}^+] = 0.25$  mM. (65.81 - 263.24)  $\mu\text{g}$  pure PtDH, (61.61 - 246.44)  $\mu\text{g}$  pure MeFoDH1, and (0 ; 10 ; 20 ; 40  $\mu\text{L}$ ) PEGDGE ( $M_n$  500 Da) were added to “S” and the solution was stirred at 500 rpm during 30 min with or without  $\text{CO}_2$  bubbling as detailed below. All reactions were performed in test tubes with septum caps. The first fraction of 1 mL was recovered after 5 min of stirring and the second fraction was recovered after 30 min of reaction.

### S4.2- Influence of $\text{CO}_2$ bubbling

The same experiment detailed in S4.1 was done with and without bubbling  $\text{CO}_2$ .  $\text{CO}_2$  gas ( $\geq 99.995$  %, Air Liquide) was bubbled through a septum cap from a compressed gas cylinder equipped with a manometer and connected to a flowmeter at a constant flow rate of ca.  $200 \text{ mL min}^{-1}$ .

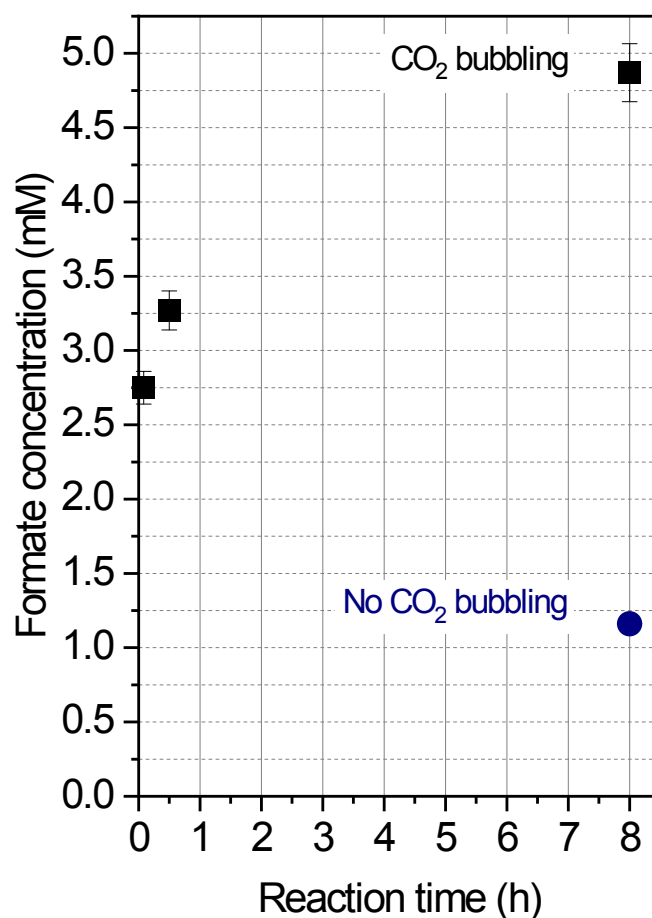

**Figure S 8.** Formate concentration as a function of time with and without CO<sub>2</sub> bubbling.

## S5- Flow through reaction

### S5.1- Monoliths preparation and characterization

The first step consists on preparing a silica monolith according to the procedure detailed in the literature.[5] In order to add a carbon replica, the obtained silica monolith with hierarchical porosity has been functionalized with amino groups, keeping the porous structure, to allow a better impregnation of a sucrose solution (carbon precursor).[6]

#### Amino-functionalization of SiO<sub>2</sub> monolith

The silica monolith was functionalized with 3-(amino propyl) triethoxysilane (APTES) H<sub>2</sub>N(CH<sub>2</sub>)<sub>3</sub>Si(OC<sub>2</sub>H<sub>5</sub>)<sub>3</sub>. The functionalization consists on immersing the

silica monolith in a solution of 3.6 mL APTES in 50 mL ethanol. The functionalization was done using a reflux condenser at 80 °C during 18 h.

The obtained amino-functionalized silica monolith was washed with ethanol and dried at 80 °C during 48 h.

### **Hydrothermal carbonization**

0.36 g of amino-functionalized silica monolith  $\text{SiO}_2\text{-NH}_2$  was immersed into 25 mL of 1.26 M sucrose solution. The impregnation solution and monoliths underwent a treatment into a Teflon inlet inside a stainless steel autoclave at 110 °C during 2 h to force the diffusion of sucrose (carbon precursor) into the mesoporous network. Then the sucrose underwent a hydrothermal carbonization at 180 °C during 16 h. The resulting brown composite  $\text{SiO}_2$ -hydrochar was washed with water, ethanol and acetone until uncolored wash solution was observed. Then it was dried at room temperature. The composite  $\text{SiO}_2$ -hydrochar was pyrolyzed as follow: 2 h at 350 °C, 2 h at 550 °C and 2 h at 950 °C with a ramp of 2 °C/min in a tubular oven under argon flow ( $150 \text{ mL}\cdot\text{min}^{-1}$ ). The  $\text{SiO}_2$ -carbon composite was obtained.

$\text{SiO}_2$  was removed from the  $\text{SiO}_2$ -carbon composite by treating it with sodium hydroxide solution (NaOH, 2M) at 100 °C during 24 h to obtain the monolithic carbon replica. The monolithic carbon replica was then washed with water and ethanol and dried at 100°C overnight.

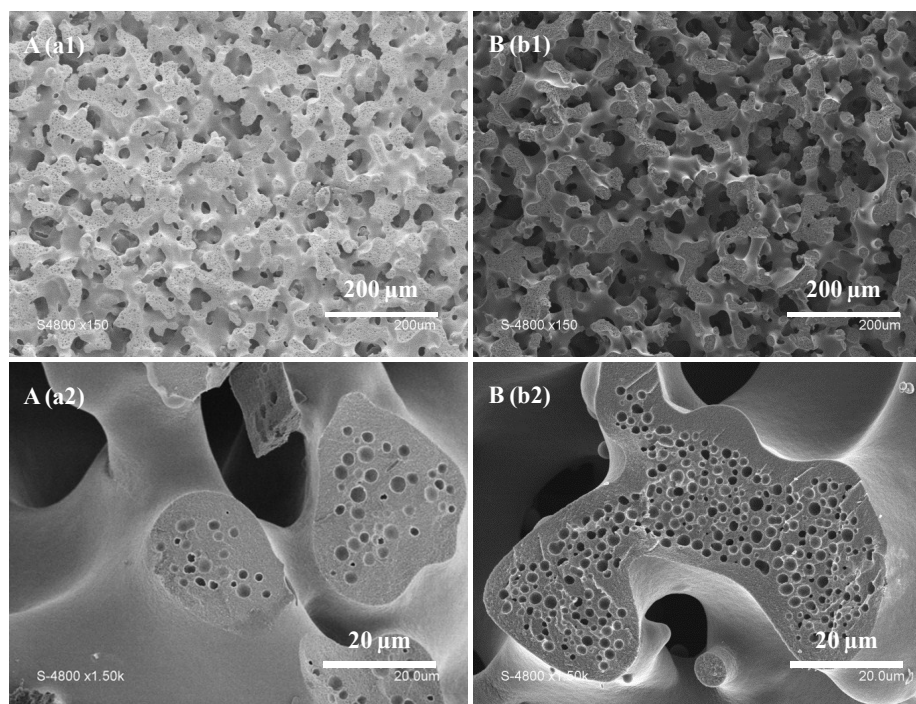

**Figure S 9.** Scanning electron micrographs of (A) the silica monolithic support and (B) the carbon monolithic support.

| Monolith       | $S_{\text{BET}}^{\phi}$<br>( $\text{m}^2/\text{g}$ ) | $V_{\text{macro}}^{\S}$<br>( $\text{cm}^3 \text{g}^{-1}$ ) | $V_{\text{meso}}^{\phi}$<br>( $\text{cm}^3 \text{g}^{-1}$ ) | $V_{\text{micro}}^{\ddagger}$<br>( $\text{cm}^3 \text{g}^{-1}$ ) | $\emptyset_{\text{macropores}}^{\S}$<br>( $\mu\text{m}$ ) | $\emptyset_{\text{mesopores}}^{\dagger}$<br>(nm) |
|----------------|------------------------------------------------------|------------------------------------------------------------|-------------------------------------------------------------|------------------------------------------------------------------|-----------------------------------------------------------|--------------------------------------------------|
| Silica         | 324                                                  | 1.9                                                        | 0.9                                                         | --                                                               | $41 \pm 4$                                                | 20                                               |
| Carbon replica | 1100                                                 | 2.5                                                        | 1.9                                                         | 0.15                                                             | $35 \pm 4$                                                | 7 & 13                                           |

**Table S1.** Textural properties of the native silica monolith and its carbon replica determined by  $^{\S}\text{Hg}$  porosimetry,  $^{\phi}\text{N}_2$  sorption at 77 K,  $^{\dagger}\text{BJH}$  method (desorption) and  $^{\ddagger}\text{t}$ -plot method.

## S5.2- Experimental procedure

The design of the reactor consisted on putting a monolith (55 mg carbon or 85 mg silica; which corresponded to a total pore volume of c.a. 0.24 mL for each monolith) between two steel tubes into a heat shrinkable Teflon sheath (FEP AWG 6 from Castello France). The reactor is placed into a tubular oven. The tube is drawn under vacuum then placed under argon flow ( $150 \text{ mL}\cdot\text{min}^{-1}$ ) in order to preserve the carbon monolith during the thermal treatment. The temperature is fixed at  $350^\circ\text{C}$  with a ramp of  $10^\circ\text{C}/\text{min}$  during 10 min.

Once we obtained the reactor, 20 mL of phosphite buffer solution 500 mM, pH 6.4 was circulated through the reactor at a rate of  $0.2 \text{ mL}\cdot\text{min}^{-1}$  allowing its conditioning before the immobilization of enzymes. Subsequently, 0.276 mL of an enzymatic solution, equivalent to the total volume of the reactor, containing 500 mM phosphite buffer pH 6.4, 263.23  $\mu\text{g}$  PtDH, 246.44  $\mu\text{g}$  MeFoDH1, 40  $\mu\text{L}$  PEGDGE and 0.25 mM  $\text{NAD}^+$ , is passed through the monolith at a rate of  $0.2 \text{ mL}\cdot\text{min}^{-1}$  in order to fill its porosity. Then the reactor is placed at  $4^\circ\text{C}$  during 24 hours. Enzymes aggregates (MeFoDH1 + PtDH) were formed thanks to PEGDGE. In these aggregates NAD cofactor is expected to be trapped. Thereafter, the reactor is washed by circulating 20 mL of phosphite buffer solution 500 mM pH 6.4 at a rate of  $0.2 \text{ mL}\cdot\text{min}^{-1}$ .

A solution containing 500 mM phosphite buffer pH 6.4 and 100 mM  $\text{NaHCO}_3$ , where  $\text{CO}_2$  was bubbled was passed through the reactor at a rate of  $0.2 \text{ mL}\cdot\text{min}^{-1}$  and 1 mL fractions were recovered every 5 min during 45 min. The fractions were analyzed by HPLC in order to monitor the production of formate.

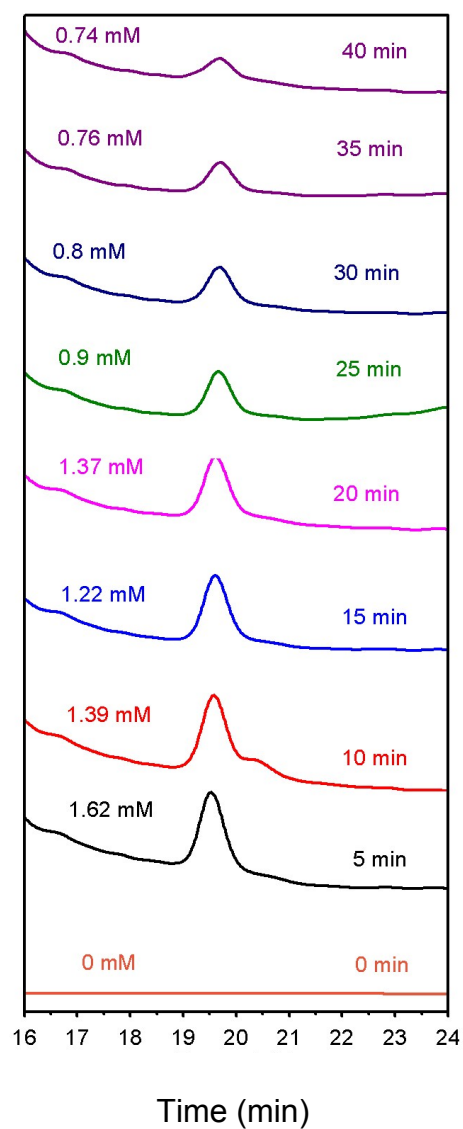

**Figure S10.** Typical chromatograms obtained for the flow through reactor with carbon monolith

## S6- CO<sub>2</sub> adsorption isotherms of monolithic supports at 298 K

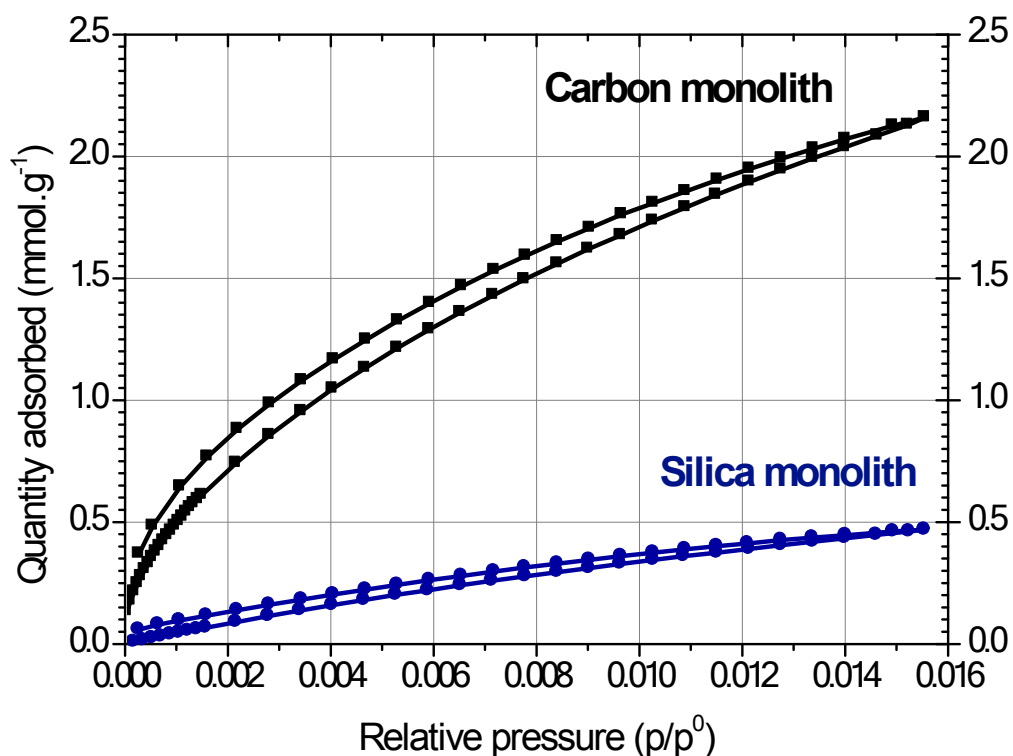

**Figure S11.** CO<sub>2</sub> adsorption isotherms of monolithic supports performed at 298 K from  $p/p^0 = 0$  to  $p/p^0 = 0.0156$  (1 atm), using a Micromeritics 3Flex surface characterization analyzer. CO<sub>2</sub> uptake at 1 atm ( $p/p^0 = 0.0156$ ) and 298 K (25°C): 0.5 mmol.g<sup>-1</sup> for the silica monolith and 2.2 mmol.g<sup>-1</sup> for the carbon monolith.

## S7- Comparison of catalytic activity with literature

**Table S.2.** Comparison of catalytic activity with literature

| Homogeneous catalysis |                                                            |           |                                     |                                          |                                    |                  |
|-----------------------|------------------------------------------------------------|-----------|-------------------------------------|------------------------------------------|------------------------------------|------------------|
| Catalyst              | Remarks                                                    | T (°C)    | P (atm)                             | TON                                      | TOF (min <sup>-1</sup> )           | Ref              |
| MeFoDH1               | <b>Batch reactor – free enzymes</b>                        | <b>25</b> | <b>1</b>                            | <b>4 460</b>                             | <b>149</b>                         | <b>Our study</b> |
| CbFoDH                | Electrochemical regeneration w/o NAD (Artificial cofactor) | 25        | 1                                   | 16                                       | 16                                 | [7]              |
| Ir complex            | Pincer complex                                             | 140       | 80 H <sub>2</sub> /CO <sub>2</sub>  | 3 500 000                                | 1 217                              | [8]              |
| Ru complex            | [Ru <sub>3</sub> (CO) <sub>12</sub> ] in Ionic liquid      | 80        | 60 H <sub>2</sub> /CO <sub>2</sub>  | 17 000                                   | 5                                  | [9]              |
| Supported catalysis   |                                                            |           |                                     |                                          |                                    |                  |
| Catalyst              | Remarks                                                    | T (°C)    | P (atm)                             | TON                                      | TOF (min <sup>-1</sup> )           | Ref              |
| MeFoDH1               | <b>Flow reactor - CLEAs@Carbon</b>                         | <b>25</b> | <b>1</b>                            | <b>6 653</b>                             | <b>166</b>                         | <b>Our study</b> |
| CbFoDH                | CbFoDH@Rh-NU-1006 (MOF) Photochemical NAD regeneration     | RT        | 1                                   | 346 <sup>†</sup>                         | 14 <sup>†</sup>                    | [10]             |
| CbFoDH                | CbFoDH@Core-shell NP No NAD regeneration                   | 37        | 1                                   | 15                                       | 0.25                               | [11]             |
| Ru complex            | Ru@Covalent triazine framework                             | 120       | 80 H <sub>2</sub> /CO <sub>2</sub>  | 20 000                                   | 646 <sup>§</sup>                   | [12]             |
| Ir complex            | Ir@Porous organic polymer                                  | 140       | 80 H <sub>2</sub> /CO <sub>2</sub>  | 25 135                                   | 18 <sup>‡</sup>                    | [13]             |
| Ir complex            | Ir-PEI@Titanate nanotube                                   | 140       | 20 H <sub>2</sub> /CO <sub>2</sub>  | 1 012                                    | 129                                | [14]             |
| PdAg NP               | PdAg@SBA-15                                                | 100       | 20 H <sub>2</sub> /CO <sub>2</sub>  | 874                                      | 0.6                                | [15]             |
| Ru complex            | Ru@bpyTN-30-CTF Fixed bed continuous flow reactor          | 140       | 140 H <sub>2</sub> /CO <sub>2</sub> | 524 000 <sup>¥</sup>                     | 12 <sup>¥</sup>                    | [16]             |
| DvH-FoDH              | Gas diffusion electrode w/o NAD (Viologen mediator)        | RT        | 1                                   | 2 460 <sup>‡</sup> (66 243) <sup>§</sup> | 0.9 <sup>‡</sup> (23) <sup>§</sup> | [17]             |
| Sn NP                 | Electrocatalysis – flow cell                               | 70        | 1                                   | 184 <sup>  </sup>                        | 1 <sup>  </sup>                    | [18]             |
| 2D-Bi                 | Electrocatalysis – flow cell                               | RT        | 1                                   | 35 000 <sup>z</sup>                      | 20                                 | [19]             |
| DvH-FoDH              | RuP TiO <sub>2</sub>  DvH-FoDH Photocatalysis w/o NAD      | 25        | 1                                   | 485 000 <sup>£</sup>                     | 660 <sup>¤</sup>                   | [20]             |
| Sn-GaN-Si             | Photoelectrocatalysis (at - 0.53 V vs. RHE)                | RT        | 1                                   | 64 000 <sup>#</sup>                      | 107 <sup>#</sup>                   | [21]             |
|                       | Photocatalysis (at + 0.02 V vs. RHE)                       | RT        | 1                                   | 312 <sup>¶</sup>                         | 2.6 <sup>¶</sup>                   | [21]             |

<sup>†</sup>Determined over 24 hours; <sup>§</sup>Determined in the first 15 minutes; <sup>‡</sup>over 20 hours; <sup>¥</sup>over 30 days; <sup>‡</sup>over 48 hours at - 0.59 V vs. SHE, according to HPLC analysis; <sup>§</sup>over 48 hours at - 0.59 V vs. SHE, based on the current density and assuming a faradaic efficiency (FE) of 100 %; <sup>||</sup>Calculated from a partial current density of 51.7 mA cm<sup>-2</sup> and a FE of 93.3 % over 3 hours; <sup>z</sup>Calculated from a partial current

density of 30 mA cm<sup>-2</sup> and an average FE of 80 % over 100 hours; <sup>‡</sup>over 24 hours; <sup>‡</sup>over 6 hours; <sup>#</sup>over 10 hours; <sup>¶</sup>over 2 hours.

## References

- [1] T. W. Johannes *et al.* Directed evolution of a thermostable phosphate dehydrogenase for NAD(P)H regeneration, *Appl. Environ. Microbiol.* **71**, **2005**, 5728-5734
- [2] R. Cazelles *et al.* Reduction of CO<sub>2</sub> to methanol by a polyenzymatic system encapsulated in phospholipids-silica nanocapsules. *New J. Chem.* **37**, **2013**, 3721-3730.
- [3] H. Choe *et al.* Efficient CO<sub>2</sub>-reducing activity of NAD-dependent formate dehydrogenase from *Thiobacillus sp.* KNK65MA for formate production from CO<sub>2</sub> gas, *PLOS ONE* **9**, **2014**, e103111
- [4] K. Sakai *et al.* Interconversion between formate and hydrogen carbonate by tungsten-containing formate dehydrogenase-catalyzed mediated bioelectrocatalysis, *Sens. Bio-sensing Res.* **5**, **2015**, 90-96
- [5] K. Szymanska *et al.*, Low back-pressure hierarchically structured multichannel microfluidic bioreactors for rapid protein digestion – Proof of concept, *Chem. Eng. J.* **287**, **2016**, 148-154
- [6] L. Yu *et al.* Hydrothermal nanocasting : synthesis of hierarchically porous carbon monoliths and their application in lithium-sulfur batteries, *Carbon* **61**, **2013**, 245-253
- [7] S. Ikeyama *et al.* An artificial co-enzyme based on the viologen skeleton for highly efficient CO<sub>2</sub> reduction to formic acid with formate dehydrogenase, *ChemCatChem* **9**, **2017**, 833-838
- [8] R. Tanaka *et al.* Catalytic Hydrogenation of Carbon Dioxide Using Ir(III)-Pincer Complexes, *J. Am. Chem. Soc.* **131**, **2009**, 14168–14169
- [9] A. Weilhard *et al.* Selective CO<sub>2</sub> Hydrogenation to Formic Acid with Multifunctional Ionic Liquids, *ACS Catal.* **8**, **2018**, 1628-1634
- [10] Y. Chen *et al.* Integration of Enzymes and Photosensitizers in a Hierarchical Mesoporous Metal–Organic Framework for Light-Driven CO<sub>2</sub> Reduction, *J. Am. Chem. Soc.* **142**, **2020**, 1768-1773
- [11] Y.K. Kim *et al.* Enhancement of formic acid production from CO<sub>2</sub> in formate dehydrogenase reaction using nanoparticles, *RSC Adv.* **6**, **2016**, 109978- 109982
- [12] G. H. Gunasekar *et al.* Hydrogenation of CO<sub>2</sub> to Formate using a Simple, Recyclable, and Efficient Heterogeneous Catalyst, *Inorg. Chem.* **58**, **2019**, 3717–3723
- [13] X. Shao *et al.* Iridium single-atom catalyst performing a quasi-homogeneous hydrogenation transformation of CO<sub>2</sub> to formate, *Chem.* **5**, **2019**, 693–705.

- [14] Y. Kuwahara *et al.*, Poly(ethyleneimine)-tethered Ir complex catalyst immobilized in titanate nanotubes for hydrogenation of CO<sub>2</sub> to formic acid, *ChemCatChem* **9**, **2017**, 1906-1914.
- [15] K. Mori *et al.* Phenylamine-functionalized mesoporous silica supported PdAg nanoparticle: a dual heterogeneous catalyst for the formic acid/CO<sub>2</sub>-mediated chemical hydrogen delivery/storage, *Chem. Commun.* **53**, **2017**, 4677-4680.
- [16] K. Park *et al.* CO<sub>2</sub> hydrogenation to formic acid over heterogenized ruthenium catalysts using a fixed bed reactor with separation units, *Green Chem.* **22**, **2020**, 1639-1649.
- [17] J. Szczesny *et al.* Electroenzymatic CO<sub>2</sub> Fixation Using Redox Polymer/Enzyme-Modified Gas Diffusion Electrodes, *ACS Energy Lett.* **5**, **2020**, 321-327.
- [18] W. Lee *et al.* Catholyte-Free Electrocatalytic CO<sub>2</sub> Reduction to Formate, *Angew. Chem. Int. Ed.* **57**, **2018**, 6883-6887.
- [19] C. Xia *et al.* Continuous production of pure liquid fuel solutions via electrocatalytic CO<sub>2</sub> reduction using solid-electrolyte devices, *Nature Energy* **4**, **2019**, 776-785.
- [20] M. Miller *et al.* Interfacing Formate Dehydrogenase with Metal Oxides for the Reversible Electrocatalysis and Solar-Driven Reduction of Carbon Dioxide, *Angew. Chem. Int. Ed.* **58**, **2019**, 4601-4605.
- [21] B. Zhou *et al.* A GaN:Sn nanoarchitecture integrated on a silicon platform for converting CO<sub>2</sub> to HCOOH by photoelectrocatalysis, *Energy Environ. Sci.* **12**, **2019**, 2842-2848.
